# Supplementary material for: Baicalin Relieves LPS-Induced Lung Inflammation via the NF-κB and MAPK Pathways
Source: MDPI journal article supplement (doi:10.3390/molecules28041873), 2023-02-16
Supplement: s1 [file s1]

**Supplement Table S1 Effect of baicalin on the number and proportion of leukocyte cell in LPS-induced mice for 6h, 12h and 24h.**

| Item   | Group and time |       |       |       |       |       |              |       |       | Unit                | Reference range |
|--------|----------------|-------|-------|-------|-------|-------|--------------|-------|-------|---------------------|-----------------|
|        | Control        |       |       | LPS   |       |       | LPS+Baicalin |       |       |                     |                 |
|        | 6 h            | 12 h  | 24 h  | 6 h   | 12 h  | 24 h  | 6 h          | 12 h  | 24 h  |                     |                 |
| WBC    | 6.2            | 6.1   | 5.5   | 12.7  | 13.1  | 8.8   | 7.1          | 6.0   | 5.7   | 10 <sup>9</sup> /L  | 0.8-6.8         |
| Lymph  | 4.1            | 4.1   | 3.0   | 6.4   | 8.4   | 5.8   | 5.2          | 3.1   | 3.9   | 10 <sup>9</sup> /L  | 0.7-5.7         |
| Mon    | 0.3            | 0.3   | 0.4   | 0.7   | 1.3   | 0.3   | 0.5          | 0.3   | 0.2   | 10 <sup>9</sup> /L  | 0.0-0.3         |
| Gran   | 1.8            | 1.7   | 2.1   | 5.6   | 3.4   | 2.7   | 1.4          | 2.6   | 1.6   | 10 <sup>9</sup> /L  | 0.1-1.8         |
| Lymph% | 66.2           | 67.5  | 54.9  | 50.4  | 64.1  | 65.9  | 73.2         | 51.7  | 68.4  | %                   | 55.8-90.6       |
| Mon%   | 4.8            | 4.5   | 6.7   | 5.5   | 9.9   | 3.4   | 7.1          | 5.7   | 3.9   | %                   | 1.8-6.0         |
| Gran%  | 29.0           | 28.0  | 38.4  | 44.1  | 26.0  | 30.7  | 19.7         | 42.6  | 27.7  | %                   | 8.6-38.9        |
| RBC    | 11.68          | 12.02 | 11.40 | 12.04 | 11.43 | 11.76 | 11.31        | 11.38 | 11.89 | 10 <sup>12</sup> /L | 6.36-9.42       |
| HGB    | 176            | 183   | 173   | 182   | 172   | 181   | 163          | 174   | 179   | g/L                 | 110-143         |
| HCT    | 55.5           | 58.0  | 54.6  | 58.2  | 54.0  | 57.7  | 51.6         | 55.9  | 57.1  | %                   | 34.6-44.6       |
| MCV    | 47.6           | 48.3  | 47.9  | 48.4  | 47.3  | 49.1  | 45.7         | 49.2  | 48.1  | fL                  | 48.2-58.3       |
| MCH    | 15.0           | 15.2  | 15.1  | 15.1  | 15.0  | 15.3  | 14.4         | 15.2  | 15.0  | pg                  | 15.8-19         |
| MCHC   | 317            | 315   | 316   | 312   | 318   | 313   | 315          | 311   | 313   | g/L                 | 302-353         |
| RDW    | 14.3           | 14.3  | 12.9  | 13.2  | 13.5  | 13.6  | 14.1         | 14.0  | 13.2  | %                   | 13-17           |
| PLT    | 1090           | 1143  | 1200  | 1181  | 1017  | 1081  | 976          | 1039  | 1154  | 10 <sup>9</sup> /L  | 450-1590        |
| MPV    | 6.7            | 7.2   | 6.7   | 6.6   | 6.7   | 6.6   | 6.2          | 6.6   | 7.0   | fL                  | 3.8-6.0         |
| PDW    | 16.7           | 16.7  | 17.0  | 16.8  | 16.9  | 16.4  | 16.4         | 16.6  | 16.8  |                     |                 |

<sup>1</sup>CON, control group; LPS, LPS group; LPS+BA, LPS+baicalin group. n=6 in each group; <sup>2</sup>WBC, white blood cell; <sup>3</sup>Lymph, Lymphocyte; <sup>4</sup>Mon, Monocyte; <sup>5</sup>Gran, neutrophil; <sup>6</sup>RBC, red blood cell; <sup>7</sup>HGB, hemoglobin; <sup>8</sup>HCT, hematocrit; <sup>9</sup>MCV, Mean Corpuscular Volume; <sup>10</sup>MCH, Mean Corpuscular Hemoglobin; <sup>11</sup>MCHC, Mean Corpuscular Hemoglobin Concentration; <sup>12</sup>RDW, red cell distribution width; <sup>13</sup>PLT, Platelets; <sup>14</sup>MPV, Mean Platelet Volume; <sup>15</sup>PDW, platelet distribution width. <sup>a-b</sup> Means with different superscript letter differ ( $P < 0.05$ ) within groups.
